# Supplementary figures and images for: Mycolic acid-specific T cells protect against Mycobacterium tuberculosis infection in a humanized transgenic mouse model
Source: eLife journal article supplement (doi:10.7554/elife.08525), 2015-12-10

**Figure 7-Figure Supplement 1**

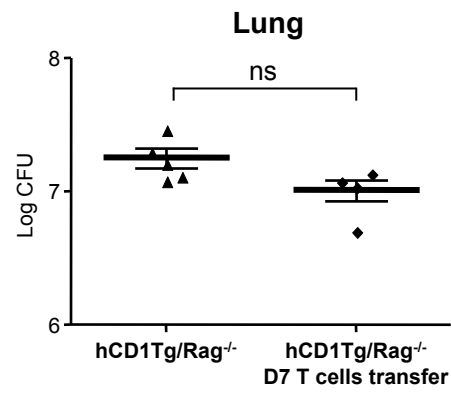

Supplement: supp [file elife-08525-supp-v1.zip]

**Figure 2-Figure Supplement 1**

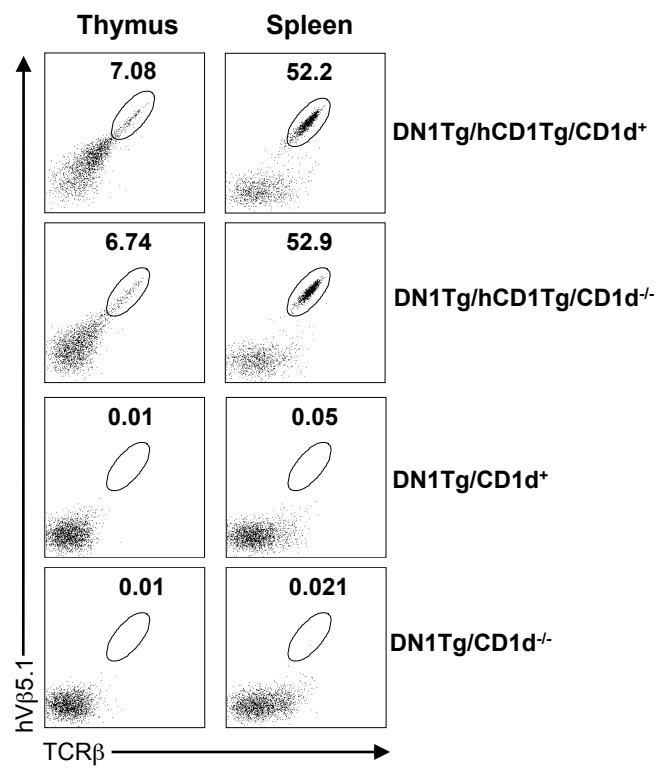

**Figure 7-Figure Supplement 1**

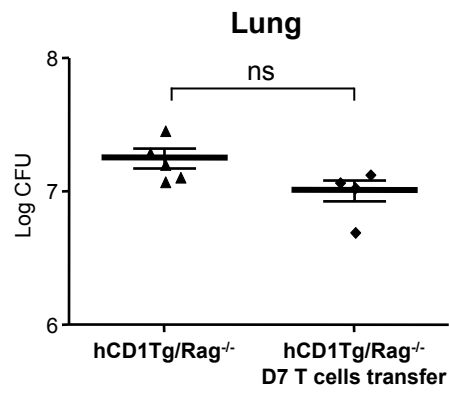

Supplement: supp [file elife-08525-supp-v1.zip]
